# Supplementary material for: Quantitative assessment of pregnancy outcome following recurrent miscarriage clinic care: a prospective cohort study
Source: PubMed Central journal article supplement — BMJ Open. 2022 Feb 2;12(2):e052661. doi: 10.1136/bmjopen-2021-052661 (PMC8811565; doi:10.1136/bmjopen-2021-052661), 2022-02-02
Supplement: bmjopen-2021-052661supp001.pdf [file bmjopen-2021-052661supp001.pdf]

1 Dashboard

Historic Data (Pre Registration)

| Trust                                          | No of Couples | No of Women | No of Men | No of Pregnancies |
|------------------------------------------------|---------------|-------------|-----------|-------------------|
| University Hospitals Coventry and Warwickshire | 897           | 897         | 736       | 3768              |

Age at Registration (female only)

| Age   | No of Patients | % of Patients |
|-------|----------------|---------------|
| <35   | 445            | 50            |
| 35-40 | 318            | 35            |
| >40   | 124            | 14            |

History of miscarriage/live births

| Patients              | No of Patient | % of Patients |
|-----------------------|---------------|---------------|
| 2 miscarriages        | 221           | 25            |
| 3 miscarriages        | 248           | 28            |
| 4 miscarriages        | 173           | 19            |
| 5 miscarriages        | 87            | 10            |
| >5 miscarriages       | 118           | 13            |
| 1 or more live births | 326           | 37            |

Ongoing Miscarriage Outcomes (Post Registration)

Trust: University Hospitals Coventry and Warwickshire  
Pregnancies Post Registration: 634

Miscarriage/Live Birth Rates by conception type (percentages by row)

| All conception types    | No of Pregnancies | % Miscarriage (preg. loss w/ or w/o US) | % Late Miscarriage (12-24 weeks) | % Live Birth | % Other Loss (still birth, ectopic, molar, resolved PUL, termination) | % Ongoing | % Outcome Unknown | % Outcome Not Applicable |
|-------------------------|-------------------|-----------------------------------------|----------------------------------|--------------|-----------------------------------------------------------------------|-----------|-------------------|--------------------------|
| All conception types    | 634               | 32                                      | 1                                | 40           | 2                                                                     | 20        | 4                 | 0                        |
| Natural conception only | 538               | 33                                      | 1                                | 40           | 2                                                                     | 20        | 4                 | 0                        |

Miscarriage/Live Birth Rates by age of mother at delivery (percentages by row)

|       | No of Pregnancies | % Miscarriage (preg. loss w/ or w/o US) | % Late Miscarriage (12-24 weeks) | % Live Birth | % Other Loss (still birth, ectopic, molar, resolved PUL, termination) | % Ongoing | % Outcome Unknown | % Outcome Not Applicable |
|-------|-------------------|-----------------------------------------|----------------------------------|--------------|-----------------------------------------------------------------------|-----------|-------------------|--------------------------|
| <35   | 315               | 32                                      | 1                                | 42           | 3                                                                     | 18        | 4                 | 0                        |
| 35-40 | 247               | 30                                      | 1                                | 41           | 2                                                                     | 23        | 3                 | 0                        |
| >40   | 71                | 39                                      | 0                                | 31           | 1                                                                     | 20        | 8                 | 0                        |

Miscarriage/Live Birth Rates by history of miscarriage (percentages by row)

|    | No of Pregnancies | % Miscarriage (preg. loss w/ or w/o US) | % Late Miscarriage (12-24 weeks) | % Live Birth | % Other Loss (still birth, ectopic, molar, resolved PUL, termination) | % Ongoing | % Outcome Unknown | % Outcome Not Applicable |
|----|-------------------|-----------------------------------------|----------------------------------|--------------|-----------------------------------------------------------------------|-----------|-------------------|--------------------------|
| 2  | 178               | 24                                      | 1                                | 48           | 1                                                                     | 26        | 1                 | 0                        |
| 3  | 172               | 29                                      | 1                                | 45           | 2                                                                     | 18        | 4                 | 0                        |
| 4  | 118               | 36                                      | 0                                | 35           | 3                                                                     | 19        | 7                 | 1                        |
| 5  | 71                | 41                                      | 1                                | 34           | 0                                                                     | 17        | 7                 | 0                        |
| >5 | 81                | 42                                      | 4                                | 31           | 7                                                                     | 12        | 4                 | 0                        |

2

The screenshot shows a web interface for a patient's details. The 'Your Details' section includes fields for Name (Khan, Omer) and Trust (University Hospitals Coventry and Warwickshire). The 'Your Current Miscarriage Roles' section lists roles such as 'Specialist Obstetrician' and 'Specialist Gynaecologist'.

The screenshot shows the 'View Baseline Visit' form. It includes sections for 'Relationship Details', 'Pregnancy History', and 'Current Pregnancy'. There are tabs for 'General Information', 'Pregnancy', and 'Follow Up'. The form contains various input fields and checkboxes for recording pregnancy details.

The screenshot shows the 'View Follow Up Visit' form. It features a table for 'Pregnancy History' with columns for Year, Month, Gestation (weeks), Gestational (days), Method of conception, Any ultrasound with findings?, Sex, Outcome (weeks), % Miscarriage (12-24 weeks), and Mode of delivery (weeks). The table shows one entry for 2017, April, 3 weeks gestation, with a 2% miscarriage rate and a vaginal delivery.

The screenshot shows the 'View Pregnancy Visit' form. It includes sections for 'General Information', 'Pregnancy', and 'Follow Up'. There are tabs for 'General Information', 'Pregnancy', and 'Follow Up'. The form contains various input fields and checkboxes for recording pregnancy visit details.

3

4
