# Supplementary material for: Quantitative assessment of pregnancy outcome following recurrent miscarriage clinic care: a prospective cohort study
Source: HighWire-hosted journal article supplement (doi:10.1136/bmjopen-2021-052661), 2022-02-01
Supplement: bmjopen-2021-052661supp002_data_supplement.pdf [file bmjopen-2021-052661supp002_data_supplement.pdf]

## Registration form

### Male details

|                                                           |                                 |  |
|-----------------------------------------------------------|---------------------------------|--|
| Title                                                     | Date of birth                   |  |
| Surname                                                   | Ethnic group (see last page)*   |  |
| First and forename(s)                                     | Religion (see last page)*       |  |
| Address                                                   | Marital status (see last page)* |  |
|                                                           | Education (see last page)*      |  |
|                                                           | Occupation                      |  |
|                                                           | NHS number                      |  |
|                                                           | Hospital number                 |  |
| City/town                                                 | GP name                         |  |
| County                                                    | GP address                      |  |
| Telephone (Home)                                          |                                 |  |
| Telephone (Mobile)                                        | GP telephone                    |  |
| E-mail address (we will use this to correspond with you): |                                 |  |

\* - enter the relevant code from the list of tables on the last page of this form

**Data Disclosure and Protection:** By completing this form, you hereby give your consent for the data to be held within the NHS in accordance with the requirements of the 1998 Data Protection Act (UK).

Male signature:

Date:

# Tommy's

## National Centre for Miscarriage Research

Please complete this form with as much information as you are able to. If you are uncertain about any of the questions you will be able to check these with your healthcare provider at your clinic appointment. Please include all medical information in your history even if you think it may be unimportant.

### Previous illnesses or medical problems

|                                                                                         |                                              | Yes                                   | No                       |
|-----------------------------------------------------------------------------------------|----------------------------------------------|---------------------------------------|--------------------------|
| Have you had any serious illnesses or medical problems?                                 |                                              | <input type="checkbox"/>              | <input type="checkbox"/> |
| <i>If yes, tick all applicable:</i>                                                     |                                              |                                       |                          |
| Diabetes                                                                                | <input type="checkbox"/>                     | Rheumatism or painful joints          | <input type="checkbox"/> |
| Thyroid problems                                                                        | <input type="checkbox"/>                     | Skin rashes or other skin disorders   | <input type="checkbox"/> |
| Cancer                                                                                  | <input type="checkbox"/>                     | Irritable Bowel Syndrome              | <input type="checkbox"/> |
| Heart problems                                                                          | <input type="checkbox"/>                     | Coeliac disease                       | <input type="checkbox"/> |
| Liver problems                                                                          | <input type="checkbox"/>                     | Crohn's disease                       | <input type="checkbox"/> |
| Migraines                                                                               | <input type="checkbox"/>                     | Autoimmune disease                    | <input type="checkbox"/> |
| Epilepsy                                                                                | <input type="checkbox"/>                     | Other inflammatory disorder           | <input type="checkbox"/> |
| Depression                                                                              | <input type="checkbox"/>                     | Thrombosis (clot in the leg or chest) | <input type="checkbox"/> |
| High blood pressure                                                                     | <input type="checkbox"/>                     | Candida                               | <input type="checkbox"/> |
| Lupus (SLE)                                                                             | <input type="checkbox"/>                     | Bacterial urethritis                  | <input type="checkbox"/> |
|                                                                                         |                                              | Abnormal urethral discharge           | <input type="checkbox"/> |
| Other illnesses                                                                         | <input type="checkbox"/> Please state: _____ |                                       |                          |
| <i>If you have ticked any of the boxes above, please provide further details below:</i> |                                              |                                       |                          |
|                                                                                         |                                              |                                       |                          |
|                                                                                         |                                              |                                       |                          |
|                                                                                         |                                              |                                       |                          |
|                                                                                         |                                              |                                       |                          |

### Current medications and allergies

*Please provide details on any allergies you have and medication you are currently taking below:*

|  |
|--|
|  |
|  |
|  |
|  |
|  |

# Tommy's

National Centre for  
Miscarriage Research

## Andrological history

Have you had a testicular examination before? Yes  No

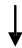

What was found? \_\_\_\_\_

Have you had any of the following diagnosed?

*Please tick all applicable options*

- |                                           |                          |                                |                          |
|-------------------------------------------|--------------------------|--------------------------------|--------------------------|
| Absence of a testicle<br>(cryptorchidism) | <input type="checkbox"/> | Mumps                          | <input type="checkbox"/> |
| Testicular pain                           | <input type="checkbox"/> | Tuberculosis (TB)              | <input type="checkbox"/> |
| Twisted testicles (torsion)               | <input type="checkbox"/> | Impotence/erectile dysfunction | <input type="checkbox"/> |
| Testicular cancer                         | <input type="checkbox"/> | Ejaculatory dysfunction        | <input type="checkbox"/> |
| Varicose veins in your scrotum            | <input type="checkbox"/> | Infertility                    | <input type="checkbox"/> |
|                                           |                          | STI's                          | <input type="checkbox"/> |

*If you have ticked any of the boxes above, please provide further details below:*

Have you had any of the following surgeries?

*Please tick all applicable options*

- |                    |                          |
|--------------------|--------------------------|
| Groin surgery      | <input type="checkbox"/> |
| Varicocelelectomy  | <input type="checkbox"/> |
| Orchidectomy       | <input type="checkbox"/> |
| Orchidopexy        | <input type="checkbox"/> |
| Surgery for hernia | <input type="checkbox"/> |



# Tommy's

National Centre for  
Miscarriage Research

## Previous paternal history

|                                                                                         |                                                                               |                          |
|-----------------------------------------------------------------------------------------|-------------------------------------------------------------------------------|--------------------------|
|                                                                                         | Yes                                                                           | No                       |
| Have you had children in another relationship?                                          | <input type="checkbox"/>                                                      | <input type="checkbox"/> |
|                                                                                         | ↓                                                                             |                          |
|                                                                                         | If yes, number of children: <input type="checkbox"/> <input type="checkbox"/> |                          |
| Have you ever had a delay (>12 months) trying to father a child?                        | <input type="checkbox"/>                                                      | <input type="checkbox"/> |
| What age did you enter puberty? <input type="checkbox"/> <input type="checkbox"/> years |                                                                               |                          |
| What is your current average ejaculatory frequency per week?                            | <input type="checkbox"/> <input type="checkbox"/> <input type="checkbox"/>    | times/week               |
| What is your usual ejaculatory frequency per month (4 weeks)?                           | <input type="checkbox"/> <input type="checkbox"/> <input type="checkbox"/>    | times/month              |

## Occupational exposure

|                                                                                                                                      |                                                                 |                          |
|--------------------------------------------------------------------------------------------------------------------------------------|-----------------------------------------------------------------|--------------------------|
|                                                                                                                                      | Yes                                                             | No                       |
| Have you been exposed to any harmful substances during your current or previous jobs?<br>(see below for examples of such substances) | <input type="checkbox"/>                                        | <input type="checkbox"/> |
| ↓                                                                                                                                    |                                                                 |                          |
| Exposure Type/Substance: (Years of exposure)                                                                                         |                                                                 |                          |
| Dust <input type="checkbox"/> <input type="checkbox"/>                                                                               | Asbestos <input type="checkbox"/> <input type="checkbox"/>      |                          |
| Fumes <input type="checkbox"/> <input type="checkbox"/>                                                                              | Noxious Gases <input type="checkbox"/> <input type="checkbox"/> |                          |
| Harmful vapours <input type="checkbox"/> <input type="checkbox"/>                                                                    | Chemicals <input type="checkbox"/> <input type="checkbox"/>     |                          |
| Other (please specify): _____                                                                                                        |                                                                 |                          |
| Please provide further details:                                                                                                      |                                                                 |                          |
| _____                                                                                                                                |                                                                 |                          |
| _____                                                                                                                                |                                                                 |                          |
| _____                                                                                                                                |                                                                 |                          |

# Tommy's

## National Centre for Miscarriage Research

### Type of underwear

What type of underwear do you wear?

Tick one option

- |                          |                          |                |                          |
|--------------------------|--------------------------|----------------|--------------------------|
| Boxer shorts             | <input type="checkbox"/> | Long underwear | <input type="checkbox"/> |
| Boxer briefs/trunks      | <input type="checkbox"/> | Jockstraps     | <input type="checkbox"/> |
| Briefs                   | <input type="checkbox"/> | None           | <input type="checkbox"/> |
| Thongs/Bikinis/G-strings | <input type="checkbox"/> |                |                          |

What type of fabric is the underwear most commonly made from?

Tick one option

- |                        |                                |
|------------------------|--------------------------------|
| Cotton                 | <input type="checkbox"/>       |
| Synthetic              | <input type="checkbox"/>       |
| Lycra                  | <input type="checkbox"/>       |
| Other (please specify) | <input type="checkbox"/> _____ |

Do they hold your testicles to the body, or are they loose?

Tick one option

- |        |                          |
|--------|--------------------------|
| Tight  | <input type="checkbox"/> |
| Loose  | <input type="checkbox"/> |
| Unsure | <input type="checkbox"/> |

Is the tightness of your underwear similar to before the last time your partner fell pregnant?

Tick one option

- |     |                          |    |                          |            |                          |
|-----|--------------------------|----|--------------------------|------------|--------------------------|
| Yes | <input type="checkbox"/> | No | <input type="checkbox"/> | Don't know | <input type="checkbox"/> |
|-----|--------------------------|----|--------------------------|------------|--------------------------|

### Technology habits

Do you ever sit with a laptop computer on your lap? Yes  No

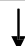

How many hours per day?   hours   minutes

Do you keep your mobile phone (that's switched on) in your trouser pocket?

Front pocket? Yes  No

Back pocket? Yes  No

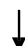

How many hours a day?   hours/day

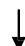

How many hours a day?   hours/day

# Tommy's

## National Centre for Miscarriage Research

### Diet and supplements

How many days a week do you eat the following foods:

*Tick one box per food type*

|                        | Number of days per week  |                          |                          |                          |                          |                          |                          |                          |
|------------------------|--------------------------|--------------------------|--------------------------|--------------------------|--------------------------|--------------------------|--------------------------|--------------------------|
|                        | 0                        | 1                        | 2                        | 3                        | 4                        | 5                        | 6                        | 7                        |
| Red meat               | <input type="checkbox"/> |
| White meat             | <input type="checkbox"/> |
| Fish                   | <input type="checkbox"/> |
| Eggs                   | <input type="checkbox"/> |
| Fresh fruit            | <input type="checkbox"/> |
| Fresh vegetables       | <input type="checkbox"/> |
| Dairy products         | <input type="checkbox"/> |
| Soya products          | <input type="checkbox"/> |
| Chocolate              | <input type="checkbox"/> |
| Nuts (almonds/walnuts) | <input type="checkbox"/> |

Do you consume sugar substitutes daily or most days of the week?  Yes  No

How many cups of coffee\* do you drink in a typical day?  cups of coffee/day

How many cups of tea\* do you drink in a typical day?  cups of tea/day

How many cans (or equivalent) of soft drink do you consume per day (e.g. energy drinks, cola)?  cans/day

Do you currently take any vitamins or supplements?  Yes  No

*If yes, please provide details:*

|   | Name of product | Frequency (times/week) | How long have you been taking it? (weeks) |
|---|-----------------|------------------------|-------------------------------------------|
| 1 |                 |                        |                                           |
| 2 |                 |                        |                                           |
| 3 |                 |                        |                                           |
| 4 |                 |                        |                                           |

\* Do not count decaffeinated drinks

# Tommy's

## National Centre for Miscarriage Research

### Diet and supplements

If you are not taking vitamins or minerals currently but have taken them in the last four months please complete this table.

|   | Name of product | Frequency (times/week) | Duration (weeks) |
|---|-----------------|------------------------|------------------|
| 1 |                 |                        |                  |
| 2 |                 |                        |                  |
| 3 |                 |                        |                  |
| 4 |                 |                        |                  |

Are you currently taking any protein shakes or protein bars?

Yes  No

If yes, please provide details:

|   | Name of product | Frequency (times/week) | Duration (weeks) |
|---|-----------------|------------------------|------------------|
| 1 |                 |                        |                  |
| 2 |                 |                        |                  |
| 3 |                 |                        |                  |
| 4 |                 |                        |                  |

### Exercise

Do you follow a regular routine of physical exercise?

Yes  No

How many days a week do you exercise?

If you exercise, how many hours a day do you exercise?

*Tick one option*

0

*Tick one option*

< 30 min

1-2

30 min - 1 hr

3-4

1 hr - 1.5 hrs

5-6

1.5 hrs - 2 hrs

7

2 hrs - 2.5 hrs

> 2.5 hrs

On average how many hours do you spend sitting on a chair per day?

Sofa or armchair  hours/day      Work chair  hours/day



# Tommy's

National Centre for Miscarriage Research

**Recreational drug use**

Do you currently drink alcohol? Yes  No

↓

How many units per week?   units per week

Do you currently smoke?

How many cigarettes?   per day

or

per week

How many vaping sessions?   per day

or

*One session is classified as 5 or more inhalations*  
  per week

Have you recently stopped?  Yes  No

↓

If yes, how recently did you stop?

< 1 month

1-6 months

> 6 months

Do you take any other recreational drugs?

↓

*If yes, please complete table:*

| Type | Frequency of use (tick one option)                                                                                                                                                                                                                                  |
|------|---------------------------------------------------------------------------------------------------------------------------------------------------------------------------------------------------------------------------------------------------------------------|
|      | <input type="checkbox"/> Daily <input type="checkbox"/> 2-3 times per week <input type="checkbox"/> Weekly <input type="checkbox"/> Bi-weekly <input type="checkbox"/> Monthly<br><input type="checkbox"/> Every 2-3 months <input type="checkbox"/> Every 6 months |
|      | <input type="checkbox"/> Daily <input type="checkbox"/> 2-3 times per week <input type="checkbox"/> Weekly <input type="checkbox"/> Bi-weekly <input type="checkbox"/> Monthly<br><input type="checkbox"/> Every 2-3 months <input type="checkbox"/> Every 6 months |
|      | <input type="checkbox"/> Daily <input type="checkbox"/> 2-3 times per week <input type="checkbox"/> Weekly <input type="checkbox"/> Bi-weekly <input type="checkbox"/> Monthly<br><input type="checkbox"/> Every 2-3 months <input type="checkbox"/> Every 6 months |
|      | <input type="checkbox"/> Daily <input type="checkbox"/> 2-3 times per week <input type="checkbox"/> Weekly <input type="checkbox"/> Bi-weekly <input type="checkbox"/> Monthly<br><input type="checkbox"/> Every 2-3 months <input type="checkbox"/> Every 6 months |
|      | <input type="checkbox"/> Daily <input type="checkbox"/> 2-3 times per week <input type="checkbox"/> Weekly <input type="checkbox"/> Bi-weekly <input type="checkbox"/> Monthly<br><input type="checkbox"/> Every 2-3 months <input type="checkbox"/> Every 6 months |
|      | <input type="checkbox"/> Daily <input type="checkbox"/> 2-3 times per week <input type="checkbox"/> Weekly <input type="checkbox"/> Bi-weekly <input type="checkbox"/> Monthly<br><input type="checkbox"/> Every 2-3 months <input type="checkbox"/> Every 6 months |

# Tommy's

## National Centre for Miscarriage Research

### Tests and investigations

Please give details of any tests or investigations you've had as a part of your treatment.

| Test/investigations                      | Date of test | Result | Which hospital or clinic did you have the test at? |
|------------------------------------------|--------------|--------|----------------------------------------------------|
| Semen analysis                           |              |        |                                                    |
| Sexually transmitted infection screening |              |        |                                                    |

*If other tests, please state below:*

| Test/investigation | Date of test | Result | Which hospital or clinic did you have the test at? |
|--------------------|--------------|--------|----------------------------------------------------|
|                    |              |        |                                                    |
|                    |              |        |                                                    |
|                    |              |        |                                                    |
|                    |              |        |                                                    |
|                    |              |        |                                                    |
|                    |              |        |                                                    |
|                    |              |        |                                                    |
|                    |              |        |                                                    |
|                    |              |        |                                                    |
|                    |              |        |                                                    |

# Tommy's

## National Centre for Miscarriage Research

### Treatments

Please give details of any treatments you've previously received or are currently receiving as a part of your miscarriage management.

Please also include any medications that you've bought yourself.

| Treatment (please include medicines and operations) | Dose | Date from* | Date to | Tick if ongoing          | Additional clinician's notes |
|-----------------------------------------------------|------|------------|---------|--------------------------|------------------------------|
|                                                     |      |            |         | <input type="checkbox"/> |                              |
|                                                     |      |            |         | <input type="checkbox"/> |                              |
|                                                     |      |            |         | <input type="checkbox"/> |                              |
|                                                     |      |            |         | <input type="checkbox"/> |                              |
|                                                     |      |            |         | <input type="checkbox"/> |                              |
|                                                     |      |            |         | <input type="checkbox"/> |                              |
|                                                     |      |            |         | <input type="checkbox"/> |                              |
|                                                     |      |            |         | <input type="checkbox"/> |                              |
|                                                     |      |            |         | <input type="checkbox"/> |                              |

\* If an operation, please give the date of operation

Tommy's Net questionnaire (Male) v2.1 26/06/2017

Page 11 of 14



**Ethnicity codes**

| <b>WHITE</b>               |                            | <b>Category includes</b>                                                                                                                                                                                                                                                                                                                                                                                              |
|----------------------------|----------------------------|-----------------------------------------------------------------------------------------------------------------------------------------------------------------------------------------------------------------------------------------------------------------------------------------------------------------------------------------------------------------------------------------------------------------------|
| A                          | White British              | English, Scottish, Welsh, Cornish                                                                                                                                                                                                                                                                                                                                                                                     |
| B                          | White Irish                |                                                                                                                                                                                                                                                                                                                                                                                                                       |
| C                          | Any other white background | Former USSR, Baltic States, Former Yugoslavia, Other European, White South African, American, Australian, New Zealander, Mixed White                                                                                                                                                                                                                                                                                  |
| CF                         | Greek                      |                                                                                                                                                                                                                                                                                                                                                                                                                       |
| CG                         | Greek Cypriot              |                                                                                                                                                                                                                                                                                                                                                                                                                       |
| CH                         | Turkish                    |                                                                                                                                                                                                                                                                                                                                                                                                                       |
| CI                         | Mediterranean              | Italian, Portuguese and Spanish                                                                                                                                                                                                                                                                                                                                                                                       |
| CJ                         | Turkish Cypriot            |                                                                                                                                                                                                                                                                                                                                                                                                                       |
| CN                         | Jewish                     |                                                                                                                                                                                                                                                                                                                                                                                                                       |
| CY                         | Other White European       |                                                                                                                                                                                                                                                                                                                                                                                                                       |
| <b>MIXED</b>               |                            |                                                                                                                                                                                                                                                                                                                                                                                                                       |
| D                          | White & Black Caribbean    |                                                                                                                                                                                                                                                                                                                                                                                                                       |
| E                          | White & Black African      |                                                                                                                                                                                                                                                                                                                                                                                                                       |
| F                          | White & Asian              |                                                                                                                                                                                                                                                                                                                                                                                                                       |
| G                          | Any other mixed background |                                                                                                                                                                                                                                                                                                                                                                                                                       |
| <b>ASIANORASIANBRITISH</b> |                            |                                                                                                                                                                                                                                                                                                                                                                                                                       |
| H                          | Indian                     | British Indian, Punjabi                                                                                                                                                                                                                                                                                                                                                                                               |
| J                          | Pakistani                  | British Pakistani, Kashmiri                                                                                                                                                                                                                                                                                                                                                                                           |
| K                          | Bangladeshi                | British Bangladeshi                                                                                                                                                                                                                                                                                                                                                                                                   |
| L                          | Any other Asian background | British Asian, East African Asian, Sri Lankan, Tamil, Sinhalese, Caribbean Asian, Nepalese, Mixed Asian                                                                                                                                                                                                                                                                                                               |
| <b>BLACKORBLACKBRITISH</b> |                            |                                                                                                                                                                                                                                                                                                                                                                                                                       |
| M                          | Black Caribbean            | Caribbean, West Indian Islands (and also Guyana) apart from Puerto Rican, Dominican and Cuban, which are Latin America                                                                                                                                                                                                                                                                                                |
| N                          | Black African              | Nigerian, Kenyan, Black South African, Other Black African Countries                                                                                                                                                                                                                                                                                                                                                  |
| P                          | Other Black background     | Black American, Mixed Black                                                                                                                                                                                                                                                                                                                                                                                           |
| PA                         | Somali                     |                                                                                                                                                                                                                                                                                                                                                                                                                       |
| PE                         | Black British              |                                                                                                                                                                                                                                                                                                                                                                                                                       |
| <b>OTHER ETHNIC GROUPS</b> |                            |                                                                                                                                                                                                                                                                                                                                                                                                                       |
| R                          | Chinese                    | inc. Hong Kong                                                                                                                                                                                                                                                                                                                                                                                                        |
| S                          | Any other ethnicity        | Japanese, Filipino, Malaysian, Aborigine, Afghani, Burmese, Fijian, Inuit, Maori, Native American Indian, Thai, Tongan, Samoan, Iranian, Israeli, Kurdish, Latin American (inc. Cuban, Puerto Rican, Dominican, Hispanic), Moroccan, Multi Ethnic Islands (inc. Seychellois, Maldivian, St. Helena), Other Middle Eastern (inc. Iraqi, Lebanese, Yemeni), Other North African, South American (inc. Central America). |
| SA                         | Africa—colour not defined  |                                                                                                                                                                                                                                                                                                                                                                                                                       |
| SC                         | Arab                       |                                                                                                                                                                                                                                                                                                                                                                                                                       |
| SD                         | Vietnamese                 |                                                                                                                                                                                                                                                                                                                                                                                                                       |
|                            |                            |                                                                                                                                                                                                                                                                                                                                                                                                                       |
| Z                          | Not stated                 |                                                                                                                                                                                                                                                                                                                                                                                                                       |

**Religion codes**

|   |                               |
|---|-------------------------------|
| A | Christian (all denominations) |
| B | Buddhist                      |
| C | Hindu                         |
| D | Jewish                        |
| E | Muslim                        |
| F | Sikh                          |
| G | Agnostic                      |
| H | Atheist                       |
| I | I'd rather not say            |
| J | Other (please specify)        |

**Marital status codes**

|   |           |
|---|-----------|
| A | Single    |
| B | Married   |
| C | Separated |
| D | Divorced  |
| E | Widowed   |

**Education codes**

|   |                                |
|---|--------------------------------|
| A | No formal qualifications       |
| B | 1-4 GCSEs (A*-C) or equivalent |
| C | 5+ GCSEs (A*-C) or equivalent  |
| D | Apprenticeship                 |
| E | 2+ A-levels or equivalent      |
| F | Degree or above                |
| G | Other (please specify)         |

## Registration form

### Female details

|                                                                  |                                        |  |
|------------------------------------------------------------------|----------------------------------------|--|
| <b>Title</b>                                                     | <b>Date of birth</b>                   |  |
| <b>Surname</b>                                                   | <b>Ethnic group (see last page)*</b>   |  |
| <b>First and forename(s)</b>                                     | <b>Religion (see last page)*</b>       |  |
| <b>Address</b>                                                   | <b>Marital status (see last page)*</b> |  |
|                                                                  | <b>Education (see last page)*</b>      |  |
|                                                                  | <b>Occupation</b>                      |  |
|                                                                  | <b>NHS number</b>                      |  |
|                                                                  | <b>Hospital number</b>                 |  |
| <b>City/town</b>                                                 | <b>GP name</b>                         |  |
| <b>County</b>                                                    | <b>GP address</b>                      |  |
| <b>Telephone (Home)</b>                                          |                                        |  |
| <b>Telephone (Mobile)</b>                                        | <b>GP telephone</b>                    |  |
| <b>E-mail address (we will use this to correspond with you):</b> |                                        |  |

\* - enter the relevant code from the list of tables on the last page of this form

**Data Disclosure and Protection:** By completing this form, you hereby give your consent for the data to be held within the NHS in accordance with the requirements of the 1998 Data Protection Act (UK).

Female signature:

Date:

# Tommy's

## National Centre for Miscarriage Research

Please complete this form with as much information as you are able to. If you are uncertain about any of the questions you will be able to check these with your healthcare provider at your clinic appointment. Please include all medical information in your history even if you think it may be insignificant.

### Relationship details

What is the length of your current relationship?   years   months

Are you and your partner blood relatives? Yes  No

↓

Please describe: \_

### Menstrual period and pregnancy information

What was the first date of your last menstrual period?   d -   m -     y

What age did your periods start?   years Yes  No

Are your periods regular?

If yes, what is your cycle length (time from the beginning of one period to the beginning of the next)?   days

If no, what is your cycle length? MIN   days  
MAX   days

How many days do you bleed for?   days

Do you get any bleeding in between your periods?

Do you have any problems with intercourse?

How frequently do you have intercourse?   per/wk  
or   per/month

Have you ever had a delay (>12 months) in trying to get pregnant?

Are you currently pregnant?

↓

Are you currently trying to become pregnant?

↓

How long have you been trying to conceive?   years   months







# Tommy's

National Centre for  
Miscarriage Research

## \* Method of conception

|   |                       |
|---|-----------------------|
| 1 | Natural               |
| 2 | IVF/ICSI              |
| 3 | IUI                   |
| 4 | Donor sperm treatment |
| 5 | Donor egg treatment   |
| 6 | Ovarian stimulation   |

## \*\*Outcome

|   |                                                             |
|---|-------------------------------------------------------------|
| 1 | Live birth                                                  |
| 2 | Stillbirth                                                  |
| 3 | Pregnancy loss without ultrasound confirmation of pregnancy |
| 4 | Miscarriage after ultrasound confirmation of pregnancy      |
| 5 | Late miscarriage (>12 weeks to <24 weeks)                   |
| 6 | Ectopic pregnancy                                           |
| 7 | Molar pregnancy                                             |
| 8 | Resolved pregnancy of unknown location                      |
| 9 | Termination                                                 |

## \*\*\*Type of management

|   |                                                  |
|---|--------------------------------------------------|
| 1 | Expectant (waited for nature to take its course) |
| 2 | Surgical (operation)                             |
| 3 | Medical (took a tablet(s))                       |

## \*\*\*\* Mode of delivery

|   |                                                        |
|---|--------------------------------------------------------|
| 1 | Unassisted vaginal                                     |
| 2 | Instrumental vaginal (forceps or suction cup delivery) |
| 3 | Elective caesarean section                             |
| 4 | Emergency caesarean section                            |
| 5 | Vaginal breech                                         |
| 6 | Not applicable                                         |

# Tommy's

National Centre for Miscarriage Research

## Previous pregnancy-related complications

|                                                                                                                                                                                                           | Yes                        | No                                  |                                                                        |
|-----------------------------------------------------------------------------------------------------------------------------------------------------------------------------------------------------------|----------------------------|-------------------------------------|------------------------------------------------------------------------|
| Do you have a history of polycystic ovaries?                                                                                                                                                              | <input type="checkbox"/>   | <input type="checkbox"/>            |                                                                        |
| Do you have a history of fibroids?                                                                                                                                                                        | <input type="checkbox"/>   | <input type="checkbox"/>            |                                                                        |
|                                                                                                                                                                                                           | ↓                          |                                     |                                                                        |
| If yes:                                                                                                                                                                                                   | Distorting womb cavity     | <input type="checkbox"/>            | <input type="checkbox"/>                                               |
|                                                                                                                                                                                                           | Not distorting womb cavity | <input type="checkbox"/>            | <input type="checkbox"/>                                               |
|                                                                                                                                                                                                           | I don't know               | <input type="checkbox"/>            | <input type="checkbox"/>                                               |
| Do you have a history of endometriosis?                                                                                                                                                                   | <input type="checkbox"/>   | <input type="checkbox"/>            |                                                                        |
| Do you have a history of pelvic inflammatory disease?                                                                                                                                                     | <input type="checkbox"/>   | <input type="checkbox"/>            |                                                                        |
| Do you have a history of uterine (womb) abnormalities?                                                                                                                                                    | <input type="checkbox"/>   | <input type="checkbox"/>            |                                                                        |
| Have you ever had a sexually transmitted disease?                                                                                                                                                         | <input type="checkbox"/>   | <input type="checkbox"/>            |                                                                        |
|                                                                                                                                                                                                           | ↓                          |                                     |                                                                        |
| If yes, when: <input type="text" value="m"/> <input type="text" value="m"/> - <input type="text" value="y"/> <input type="text" value="y"/> <input type="text" value="y"/> <input type="text" value="y"/> | Was it treated?            | <input type="checkbox"/>            | <input type="checkbox"/>                                               |
| Have you ever had any previous gynaecological surgeries?                                                                                                                                                  | <input type="checkbox"/>   | <input type="checkbox"/>            |                                                                        |
| ↓                                                                                                                                                                                                         |                            |                                     |                                                                        |
| <i>If yes, tick all applicable:</i>                                                                                                                                                                       |                            |                                     |                                                                        |
| Laser or loop excision of the cervix (LLETZ)                                                                                                                                                              | <input type="checkbox"/>   | → If yes, how many operations?      | <input type="text" value=""/> <input type="text" value=""/> operations |
| Removal of fibroids                                                                                                                                                                                       | <input type="checkbox"/>   | Removal of scar tissues in the womb | <input type="checkbox"/>                                               |
| Endometriosis surgery                                                                                                                                                                                     | <input type="checkbox"/>   | Womb septum removal                 | <input type="checkbox"/>                                               |
| Fallopian tube surgery                                                                                                                                                                                    | <input type="checkbox"/>   | Other gynaecological surgeries      | <input type="checkbox"/> If yes, state: _____                          |
| Removal of ovarian cyst(s)                                                                                                                                                                                | <input type="checkbox"/>   | Other gynaecological disorders      | <input type="checkbox"/> If yes, state: _____                          |
| Surgical management of miscarriage                                                                                                                                                                        | <input type="checkbox"/>   | I don't know                        | <input type="checkbox"/>                                               |

|                                   |                                                               |        |                                                                                                                             |          |
|-----------------------------------|---------------------------------------------------------------|--------|-----------------------------------------------------------------------------------------------------------------------------|----------|
| Date of last cervical smear test? | <input type="text" value="m"/> <input type="text" value="m"/> | -      | <input type="text" value="y"/> <input type="text" value="y"/> <input type="text" value="y"/> <input type="text" value="y"/> |          |
| Result?                           | <input type="checkbox"/>                                      | Normal | <input type="checkbox"/>                                                                                                    | Abnormal |

# Tommy's

National Centre for Miscarriage Research

## Recreational drug use

Do you currently drink alcohol?  Yes  No

How many units per week?   units per week

Do you currently smoke?  Yes  No

How many cigarettes?   per day  
or  
  per week

How many vaping sessions?   per day  
or  
*One session is classified as 5 or more inhalations*  
  per week

Have you recently stopped?  Yes  No

If yes, how recently did you stop?  
 < 1 month  
 1-6 months  
 > 6 months

Do you take any other recreational drugs?  Yes  No

*If yes, please complete table:*

| Type | Frequency of use (tick one option)                                                                                                                                                                                                                                  |
|------|---------------------------------------------------------------------------------------------------------------------------------------------------------------------------------------------------------------------------------------------------------------------|
|      | <input type="checkbox"/> Daily <input type="checkbox"/> 2-3 times per week <input type="checkbox"/> Weekly <input type="checkbox"/> Bi-weekly <input type="checkbox"/> Monthly<br><input type="checkbox"/> Every 2-3 months <input type="checkbox"/> Every 6 months |
|      | <input type="checkbox"/> Daily <input type="checkbox"/> 2-3 times per week <input type="checkbox"/> Weekly <input type="checkbox"/> Bi-weekly <input type="checkbox"/> Monthly<br><input type="checkbox"/> Every 2-3 months <input type="checkbox"/> Every 6 months |
|      | <input type="checkbox"/> Daily <input type="checkbox"/> 2-3 times per week <input type="checkbox"/> Weekly <input type="checkbox"/> Bi-weekly <input type="checkbox"/> Monthly<br><input type="checkbox"/> Every 2-3 months <input type="checkbox"/> Every 6 months |
|      | <input type="checkbox"/> Daily <input type="checkbox"/> 2-3 times per week <input type="checkbox"/> Weekly <input type="checkbox"/> Bi-weekly <input type="checkbox"/> Monthly<br><input type="checkbox"/> Every 2-3 months <input type="checkbox"/> Every 6 months |
|      | <input type="checkbox"/> Daily <input type="checkbox"/> 2-3 times per week <input type="checkbox"/> Weekly <input type="checkbox"/> Bi-weekly <input type="checkbox"/> Monthly<br><input type="checkbox"/> Every 2-3 months <input type="checkbox"/> Every 6 months |
|      | <input type="checkbox"/> Daily <input type="checkbox"/> 2-3 times per week <input type="checkbox"/> Weekly <input type="checkbox"/> Bi-weekly <input type="checkbox"/> Monthly<br><input type="checkbox"/> Every 2-3 months <input type="checkbox"/> Every 6 months |

# Tommy's

## National Centre for Miscarriage Research

### Diet and supplements

How many days a week do you eat the following foods:

*Tick one box per food type*

|                        | Number of days per week  |                          |                          |                          |                          |                          |                          |                          |
|------------------------|--------------------------|--------------------------|--------------------------|--------------------------|--------------------------|--------------------------|--------------------------|--------------------------|
|                        | 0                        | 1                        | 2                        | 3                        | 4                        | 5                        | 6                        | 7                        |
| Red meat               | <input type="checkbox"/> |
| White meat             | <input type="checkbox"/> |
| Fish                   | <input type="checkbox"/> |
| Eggs                   | <input type="checkbox"/> |
| Fresh fruit            | <input type="checkbox"/> |
| Fresh vegetables       | <input type="checkbox"/> |
| Dairy products         | <input type="checkbox"/> |
| Soya products          | <input type="checkbox"/> |
| Chocolate              | <input type="checkbox"/> |
| Nuts (almonds/walnuts) | <input type="checkbox"/> |

Do you consume sugar substitutes daily or most days of the week?  Yes  No

How many cups of coffee\* do you drink in a typical day?  cups of coffee/day

How many cups of tea\* do you drink in a typical day?  cups of tea/day

How many cans (or equivalent) of soft drink do you consume per day (e.g. energy drinks, cola)?  cans/day

Do you currently take any vitamins or supplements?  Yes  No

*If yes, please provide details:*

|   | Name of product | Frequency (times/week) | How long have you been taking it? (weeks) |
|---|-----------------|------------------------|-------------------------------------------|
| 1 |                 |                        |                                           |
| 2 |                 |                        |                                           |
| 3 |                 |                        |                                           |
| 4 |                 |                        |                                           |

\* Do not count decaffeinated drinks

# Tommy's

## National Centre for Miscarriage Research

### Diet and supplements

If you are not taking vitamins or minerals currently but have taken them in the last four months please complete this table.

|   | Name of product | Frequency (times/week) | Duration (weeks) |
|---|-----------------|------------------------|------------------|
| 1 |                 |                        |                  |
| 2 |                 |                        |                  |
| 3 |                 |                        |                  |
| 4 |                 |                        |                  |

Are you currently taking any protein shakes or protein bars?

Yes  No

If yes, please provide details:

|   | Name of product | Frequency (times/week) | Duration (weeks) |
|---|-----------------|------------------------|------------------|
| 1 |                 |                        |                  |
| 2 |                 |                        |                  |
| 3 |                 |                        |                  |
| 4 |                 |                        |                  |

### Exercise

Do you follow a regular routine of physical exercise?

Yes  No

How many days a week do you exercise?

Tick one option

0

1-2

3-4

5-6

7

If you exercise, how many hours a day do you exercise?

Tick one option

< 30 min

30 min - 1 hr

> 1 hr - 1.5 hrs

> 1.5 hrs - 2 hrs

> 2 hrs - 2.5 hrs

> 2.5 hrs

On average how many hours do you spend sitting on a chair per day?

Sofa or armchair  hours/day      Work chair  hours/day

# Tommy's

## National Centre for Miscarriage Research

### Previous illnesses or medical problems

|                                                                                         |                          | Yes                                 | No                       |
|-----------------------------------------------------------------------------------------|--------------------------|-------------------------------------|--------------------------|
| Have you had any serious illnesses or medical problems?                                 |                          | <input type="checkbox"/>            | <input type="checkbox"/> |
| <i>If yes, tick all applicable:</i>                                                     |                          |                                     |                          |
| Diabetes                                                                                | <input type="checkbox"/> | Rheumatism or painful joints        | <input type="checkbox"/> |
| Thyroid problems                                                                        | <input type="checkbox"/> | Skin rashes or other skin disorders | <input type="checkbox"/> |
| Cancer                                                                                  | <input type="checkbox"/> | Irritable Bowel Syndrome            | <input type="checkbox"/> |
| Heart problems                                                                          | <input type="checkbox"/> | Coeliac disease                     | <input type="checkbox"/> |
| Liver problems                                                                          | <input type="checkbox"/> | Crohn's disease                     | <input type="checkbox"/> |
| Migraines                                                                               | <input type="checkbox"/> | Autoimmune disease                  | <input type="checkbox"/> |
| Epilepsy                                                                                | <input type="checkbox"/> | Other inflammatory disorder         | <input type="checkbox"/> |
| Depression                                                                              | <input type="checkbox"/> | Thrombosis (clots in legs or chest) | <input type="checkbox"/> |
| High blood pressure                                                                     | <input type="checkbox"/> | Candida (thrush)                    | <input type="checkbox"/> |
| Lupus (SLE)                                                                             | <input type="checkbox"/> | Bacterial vaginosis                 | <input type="checkbox"/> |
| Abnormal vaginal discharge                                                              | <input type="checkbox"/> |                                     |                          |
| Other illnesses                                                                         | <input type="checkbox"/> | Please state: _____                 |                          |
| <i>If you have ticked any of the boxes above, please provide further details below:</i> |                          |                                     |                          |
|                                                                                         |                          |                                     |                          |
|                                                                                         |                          |                                     |                          |
|                                                                                         |                          |                                     |                          |
|                                                                                         |                          |                                     |                          |

### Current medications and allergies

*Please provide details on any allergies you have and medication you are currently taking below:*

|  |
|--|
|  |
|  |
|  |
|  |
|  |
|  |







# Tommy's

## National Centre for Miscarriage Research

### Treatments

Please give details of any treatments you've previously received or are currently receiving as a part of your miscarriage management.

Please also include any medications that you've bought yourself.

| Treatment (please include medicines and operations) | Dose | Date from* | Date to | Tick if ongoing          | Additional clinician's notes |
|-----------------------------------------------------|------|------------|---------|--------------------------|------------------------------|
|                                                     |      |            |         | <input type="checkbox"/> |                              |
|                                                     |      |            |         | <input type="checkbox"/> |                              |
|                                                     |      |            |         | <input type="checkbox"/> |                              |
|                                                     |      |            |         | <input type="checkbox"/> |                              |
|                                                     |      |            |         | <input type="checkbox"/> |                              |
|                                                     |      |            |         | <input type="checkbox"/> |                              |
|                                                     |      |            |         | <input type="checkbox"/> |                              |
|                                                     |      |            |         | <input type="checkbox"/> |                              |
|                                                     |      |            |         | <input type="checkbox"/> |                              |

\* If an operation, please give the date of operation



# Tommy's

## National Centre for Miscarriage Research

### Ethnicity codes

| WHITE               |                            | Category includes                                                                                                                                                                                                                                                                                                                                                                                                     |
|---------------------|----------------------------|-----------------------------------------------------------------------------------------------------------------------------------------------------------------------------------------------------------------------------------------------------------------------------------------------------------------------------------------------------------------------------------------------------------------------|
| A                   | White British              | English, Scottish, Welsh, Cornish                                                                                                                                                                                                                                                                                                                                                                                     |
| B                   | White Irish                |                                                                                                                                                                                                                                                                                                                                                                                                                       |
| C                   | Any other white background | Former USSR, Baltic States, Former Yugoslavia, Other European, White South African, American, Australian, New Zealander, Mixed White                                                                                                                                                                                                                                                                                  |
| CF                  | Greek                      |                                                                                                                                                                                                                                                                                                                                                                                                                       |
| CG                  | Greek Cypriot              |                                                                                                                                                                                                                                                                                                                                                                                                                       |
| CH                  | Turkish                    |                                                                                                                                                                                                                                                                                                                                                                                                                       |
| CI                  | Mediterranean              | Italian, Portuguese and Spanish                                                                                                                                                                                                                                                                                                                                                                                       |
| CJ                  | Turkish Cypriot            |                                                                                                                                                                                                                                                                                                                                                                                                                       |
| CN                  | Jewish                     |                                                                                                                                                                                                                                                                                                                                                                                                                       |
| CY                  | Other White European       |                                                                                                                                                                                                                                                                                                                                                                                                                       |
| MIXED               |                            |                                                                                                                                                                                                                                                                                                                                                                                                                       |
| D                   | White & Black Caribbean    |                                                                                                                                                                                                                                                                                                                                                                                                                       |
| E                   | White & Black African      |                                                                                                                                                                                                                                                                                                                                                                                                                       |
| F                   | White & Asian              |                                                                                                                                                                                                                                                                                                                                                                                                                       |
| G                   | Any other mixed background |                                                                                                                                                                                                                                                                                                                                                                                                                       |
| ASIANORASIANBRITISH |                            |                                                                                                                                                                                                                                                                                                                                                                                                                       |
| H                   | Indian                     | British Indian, Punjabi                                                                                                                                                                                                                                                                                                                                                                                               |
| J                   | Pakistani                  | British Pakistani, Kashmiri                                                                                                                                                                                                                                                                                                                                                                                           |
| K                   | Bangladeshi                | British Bangladeshi                                                                                                                                                                                                                                                                                                                                                                                                   |
| L                   | Any other Asian background | British Asian, East African Asian, Sri Lankan, Tamil, Sinhalese, Caribbean Asian, Nepalese, Mixed Asian                                                                                                                                                                                                                                                                                                               |
| BLACKORBLACKBRITISH |                            |                                                                                                                                                                                                                                                                                                                                                                                                                       |
| M                   | Black Caribbean            | Caribbean, West Indian Islands (and also Guyana) apart from Puerto Rican, Dominican and Cuban, which are                                                                                                                                                                                                                                                                                                              |
| N                   | Black African              | Nigerian, Kenyan, Black South African, Other Black African Countries                                                                                                                                                                                                                                                                                                                                                  |
| P                   | Other Black background     | Black American, Mixed Black                                                                                                                                                                                                                                                                                                                                                                                           |
| PA                  | Somali                     |                                                                                                                                                                                                                                                                                                                                                                                                                       |
| PE                  | Black British              |                                                                                                                                                                                                                                                                                                                                                                                                                       |
| OTHER ETHNIC GROUPS |                            |                                                                                                                                                                                                                                                                                                                                                                                                                       |
| R                   | Chinese                    | inc. Hong Kong                                                                                                                                                                                                                                                                                                                                                                                                        |
| S                   | Any other ethnicity        | Japanese, Filipino, Malaysian, Aborigine, Afghani, Burmese, Fijian, Inuit, Maori, Native American Indian, Thai, Tongan, Samoan, Iranian, Israeli, Kurdish, Latin American (inc. Cuban, Puerto Rican, Dominican, Hispanic), Moroccan, Multi Ethnic Islands (inc. Seychellois, Maldivian, St. Helena), Other Middle Eastern (inc. Iraqi, Lebanese, Yemeni), Other North African, South American (inc. Central America). |
| SA                  | Africa—colour not defined  |                                                                                                                                                                                                                                                                                                                                                                                                                       |
| SC                  | Arab                       |                                                                                                                                                                                                                                                                                                                                                                                                                       |
| SD                  | Vietnamese                 |                                                                                                                                                                                                                                                                                                                                                                                                                       |
|                     |                            |                                                                                                                                                                                                                                                                                                                                                                                                                       |
| Z                   | Not stated                 |                                                                                                                                                                                                                                                                                                                                                                                                                       |

# Tommy's

National Centre for  
Miscarriage Research

## Religion codes

|   |                               |
|---|-------------------------------|
| A | Christian (all denominations) |
| B | Buddhist                      |
| C | Hindu                         |
| D | Jewish                        |
| E | Muslim                        |
| F | Sikh                          |
| G | Agnostic                      |
| H | Atheist                       |
| I | I'd rather not say            |
| J | Other (please specify)        |

## Marital status codes

|   |           |
|---|-----------|
| A | Single    |
| B | Married   |
| C | Separated |
| D | Divorced  |
| E | Widowed   |

## Education codes

|   |                                |
|---|--------------------------------|
| A | No formal qualifications       |
| B | 1-4 GCSEs (A*-C) or equivalent |
| C | 5+ GCSEs (A*-C) or equivalent  |
| D | Apprenticeship                 |
| E | 2+ A-levels or equivalent      |
| F | Degree or above                |
| G | Other (please specify)         |
