# Supplementary material for: Quantitative assessment of pregnancy outcome following recurrent miscarriage clinic care: a prospective cohort study
Source: HighWire-hosted journal article supplement (doi:10.1136/bmjopen-2021-052661), 2022-02-01
Supplement: bmjopen-2021-052661supp003_data_supplement.pdf [file bmjopen-2021-052661supp003_data_supplement.pdf]

1 Referral criteria for Recurrent miscarriage clinic care UHCW

- 2           ○ Actively trying to conceive
- 3           ○ 2 or more pregnancy losses, including biochemical loss, miscarriage, molar
- 4           pregnancy, ectopic pregnancy and stillbirth

5

6
